# Supplementary material
Source: publisher site journal article supplement (https://www.dovepress.com/article/552382)
Supplement: Supplementary file 1 [file 552382%20Supplementary%20Material.docx]

| **Supplementary Table S1**. Trainees’ SBP (mmHg) variations across different steps of phacoemulsification cataract surgery stratified by baseline demographic and clinical factors. | | | | | |
| --- | --- | --- | --- | --- | --- |
|  |  | Steps of phacoemulsification cataract surgery | | | P-value |
|  |  | Incision | Capsulorhexis | Lens removal and IOL implantation |
| Sex | Male | 138.14 ± 21.6 | 146.03 ± 20.5 | 147.57 ± 20.1 | 0.86 |
| Female | 137.54 ± 12.8 | 145.37 ± 17.6 | 151.25 ± 16.3 |
| Level of education | PGY-2 residents | 143.79 ± 22.8 | 152.29 ± 20.9 | 150.07 ± 26.2 | 0.37 |
| PGY-3,4 residents | 138.29 ± 16.7 | 144.40 ± 18.0 | 149.43 ± 17.3 |
| Fellows | 128.30 ± 15.1 | 141.40 ± 20.7 | 146.40 ± 9.1 |
| Pre-operative use of propranolol | Yes | 127.5 ± 13.6 | 133.3 ± 14.4 | 137.8 ± 13.3 | 0.08 |
| No | 141.4 ± 18.6 | 150.5 ± 18.9 | 152.84 ± 18.7 |
| Anesthesia method | General anesthesia | 137.69 ± 19.6 | 145.06 ± 19.4 | 148.00 ± 18.7 | 0.54 |
| Topical anesthesia | 138.82 ± 13.1 | 148.82 ± 18.8 | 153.73 ± 18.0 |
| Surgical complications | Yes (complicated) | 142.33 ± 18.6 | 161.17 ± 15.2 | 158.17 ± 14.4 | 0.14 |
| No (uncomplicated) | 137.40 ± 18.5 | 144.02 ± 19.0 | 148.04 ± 18.8 |
| SBP: Systolic blood pressure, IOL: Intraocular lens, PGY-2: Second postgraduate year, PGY-3,4: Third and fourth postgraduate year. Data are presented as mean ± standard deviation. | | | | | |

| **Supplementary Table S2**. Trainees’ DBP (mmHg) variations across different steps of phacoemulsification cataract surgery stratified by baseline demographic and clinical factors. | | | | | |
| --- | --- | --- | --- | --- | --- |
|  |  | Steps of phacoemulsification cataract surgery | | | P-value |
|  |  | Incision | Capsulorhexis | Lens removal and IOL implantation |
| Sex | Male | 94.89 ± 16.1 | 95.74 ± 16.3 | 98.21 ± 21.9 | 0.84 |
| Female | 94.17 ± 9.7 | 96.37 ± 7.9 | 96.38 ± 7.8 |
| Level of education | PGY-2 residents | 103.21 ± 18.6 | 104.71 ± 19.4 | 103.36 ± 21.1 | 0.01* |
| PGY-3,4 residents | 92.46 ± 12.1 | 94.06 ± 10.3 | 98.03 ± 9.7 |
| Fellows | 90.00 ± 2.7 | 90.60 ± 7.4 | 87.53 ± 28.4 |
| Pre-operative use of propranolol | Yes | 89.8 ± 11.4 | 91.80 ± 7.3 | 95.60 ± 6.5 | 0.19 |
| No | 96.20 ± 14.2 | 98.11 ± 13.8 | 98.18 ± 19.9 |
| Anesthesia method | General anesthesia | 94.60± 14.9 | 95.63 ± 14.3 | 96.71 ± 18.9 | 0.62 |
| Topical anesthesia | 94.55 ± 6.5 | 97.64 ± 9.1 | 101.09 ± 8.9 |
| Surgical complications | Yes (complicated) | 100.17 ± 6.8 | 98.83 ± 4.7 | 99.83 ± 8.3 | 0.47 |
| No (uncomplicated) | 93.96 ± 14.2 | 95.68 ± 14.1 | 97.26 ± 18.3 |
| DBP: Diastolic blood pressure, IOL: Intraocular lens, PGY-2: Second postgraduate year, PGY-3,4: Third and fourth postgraduate year. Data are presented as mean ± standard deviation.  * indicates a statistically significant P-value (<0.05). | | | | | |

| **Supplementary Table S3**. Trainees’ HR (bpm) variations across different steps of phacoemulsification cataract surgery stratified by baseline demographic and clinical factors. | | | | | |
| --- | --- | --- | --- | --- | --- |
|  |  | Steps of phacoemulsification cataract surgery | | | P-value |
|  |  | Incision | Capsulorhexis | Lens removal and IOL implantation |
| Sex | Male | 92.11 ± 11.0 | 100.60 ± 12.5 | 105.23 ± 13.7 | 0.34 |
| Female | 96.33 ± 12.4 | 101.79 ± 16.4 | 109.42 ± 18.4 |
| Level of education | PGY-2 residents | 95.21 ± 9.0 | 107.93 ± 15.6 | 109.60 ± 15.4 | 0.30 |
| PGY-3,4 residents | 92.17 ± 13.5 | 98.26 ± 13.5 | 105.17 ± 16.8 |
| Fellows | 97.70 ± 6.2 | 101.40 ± 11.6 | 109.30 ± 12.6 |
| Pre-operative use of propranolol | Yes | 93.4 ± 7.6 | 97.00 ± 13.0 | 106.0 ± 12.1 | 0.14 |
| No | 94.6 ± 12.0 | 100.5 ± 14.5 | 107.2 ± 16.9 |
| Anesthesia method | General anesthesia | 93.44 ± 11.4 | 101.27 ± 14.0 | 106.85 ± 15.4 | 0.90 |
| Topical anesthesia | 95.55 ± 13.2 | 100.27 ± 15.2 | 107.27 ± 18.3 |
| Surgical complications | Yes (complicated) | 93.67 ± 8.5 | 103.17 ± 11.7 | 111.00 ± 14.4 | 0.70 |
| No (uncomplicated) | 93.85 ± 12.1 | 100.85 ± 14.5 | 106.47 ± 16.0 |
| HR: Heart rate, bpm: Beats per minute, IOL: Intraocular lens, PGY-2: Second postgraduate year, PGY-3,4: Third and fourth postgraduate year. Data are presented as mean ± standard deviation. | | | | | |

| **Supplementary Table S4**. Trainees’ arterial SPO2 variations across different steps of phacoemulsification cataract surgery stratified by baseline demographic and clinical factors. | | | | | |
| --- | --- | --- | --- | --- | --- |
|  |  | Steps of phacoemulsification cataract surgery | | | P-value |
|  |  | Incision | Capsulorhexis | Lens removal and IOL implantation |
| Sex | Male | 97.05 ± 3.1 | 96.63 ± 4.0 | 97.29 ± 2.4 | 0.50 |
| Female | 97.29 ± 2.9 | 97.17 ± 3.1 | 95.38 ± 4.9 |
| Level of education | PGY-2 residents | 96.86 ± 3.3 | 95.29 ± 5.7 | 95.64 ± 5.9 | 0.09 |
| PGY-3,4 residents | 96.86 ± 3.1 | 97.34 ± 2.8 | 96.51 ± 3.0 |
| Fellows | 98.70 ± 1.6 | 97.30 ± 2.11 | 97.70 ± 1.5 |
| Pre-operative use of propranolol | Yes | 97.11 ± 3.4 | 96.77 ± 2.3 | 96.72 ± 1.8 | 0.70 |
| No | 97.33 ± 3.4 | 96.87 ± 2.3 | 96.80 ± 1.6 |
| Anesthesia method | General anesthesia | 97.19 ± 3.2 | 96.50 ± 4.0 | 96.52 ± 3.8 | 0.40 |
| Topical anesthesia | 97.09 ± 2.0 | 98.36 ± 1.0 | 96.45 ± 3.3 |
| Surgical complications | Yes (complicated) | 96.67 ± 2.4 | 94.83 ± 5.0 | 94.33 ± 4.7 | 0.06 |
| No (uncomplicated) | 97.23 ± 3.1 | 97.08 ± 3.4 | 97.08 ± 3.6 |
| SPO2: Oxygen saturation, IOL: Intraocular lens, PGY-2: Second postgraduate year, PGY-3,4: Third and fourth postgraduate year. Data are presented as mean ± standard deviation. | | | | | |
